# Supplementary material
Source: publisher figshare collection journal article supplement (https://geolsoc.figshare.com/articles/dataset/_/3452957)
Supplement: Supplementary file 1 [file 1]

| Vein    | Mg   | Sc   | Mn   | Fe   | Sr    | Y     | Ba    | La    | Ce    | Pr    | Nd    | Sm   | Eu    | Gd   | Dy    | Er   | Yb   | Pb   | Eu/Eu* |
|---------|------|------|------|------|-------|-------|-------|-------|-------|-------|-------|------|-------|------|-------|------|------|------|--------|
| c1      | 3750 | 0.15 | 711  | 3109 | 11207 | 2.98  | 9.96  | 47.05 | 55.54 | 4.80  | 14.74 | 1.85 | 3.44  | 1.23 | 0.54  | 0.14 | 0.07 | 2.00 | 6.95   |
| c10     | 3097 | 0.16 | 583  | 3402 | 7570  | 3.73  | 5.05  | 2.23  | 4.43  | 0.55  | 2.23  | 0.56 | 0.73  | 0.71 | 0.58  | 0.19 | 0.10 | 1.21 | 3.59   |
| c12     | 3322 | 0.05 | 681  | 3575 | 11924 | 1.18  | 7.11  | 3.12  | 4.54  | 0.47  | 1.68  | 0.31 | 1.12  | 0.26 | 0.18  | 0.07 | 0.04 | 1.86 | 12.21  |
| c13     | 2926 | 0.11 | 659  | 3522 | 17770 | 1.67  | 19.13 | 9.24  | 15.58 | 1.69  | 6.13  | 0.98 | 3.26  | 0.63 | 0.29  | 0.10 | 0.05 | 1.63 | 13.89  |
| c16     | 2090 | 2.33 | 756  | 3226 | 12264 | 58.78 | 7.27  | 49.49 | 85.61 | 9.27  | 35.62 | 8.58 | 2.37  | 9.45 | 10.22 | 4.42 | 2.41 | 1.93 | 0.86   |
| c23     | 1789 | 0.04 | 1390 | 3141 | 7735  | 5.04  | 2.86  | 5.62  | 9.05  | 1.12  | 4.57  | 1.04 | 10.67 | 1.28 | 0.80  | 0.22 | 0.07 | 0.36 | 27.99  |
| c27     | 1821 | 0.03 | 638  | 1651 | 2098  | 1.51  | 0.18  | 0.37  | 0.59  | 0.07  | 0.32  | 0.08 | 0.04  | 0.12 | 0.14  | 0.09 | 0.06 | 0.06 | 1.47   |
| c27a    | 1639 | 0.08 | 597  | 1643 | 2572  | 1.32  | 0.40  | 0.25  | 0.49  | 0.07  | 0.31  | 0.08 | 0.04  | 0.12 | 0.14  | 0.08 | 0.05 | 0.06 | 1.18   |
| c2a     | 2521 | 0.07 | 2474 | 5880 | 7814  | 1.50  | 18.11 | 10.81 | 12.33 | 1.14  | 3.76  | 0.57 | 4.09  | 0.46 | 0.22  | 0.05 | 0.01 | 1.55 | 24.50  |
| ts15    | 2747 | 0.13 | 693  | 2898 | 15985 | 5.16  | 17.17 | 12.80 | 22.36 | 2.28  | 8.13  | 1.44 | 3.54  | 1.25 | 0.80  | 0.30 | 0.17 | 1.18 | 19.65  |
| ts20    | 1487 | 0.96 | 729  | 1262 | 1112  | 43.89 | 1.28  | 27.44 | 77.32 | 9.84  | 39.48 | 7.56 | 1.80  | 7.32 | 6.95  | 3.75 | 2.80 | 0.23 | 0.80   |
| ts32    | 2881 | 0.08 | 593  | 3446 | 9040  | 2.14  | 8.44  | 7.48  | 12.19 | 1.27  | 4.50  | 0.74 | 1.12  | 0.60 | 0.35  | 0.10 | 0.05 | 2.86 | 9.72   |
| ts37    | 2221 | 0.09 | 728  | 2581 | 11615 | 1.10  | 3.53  | 4.31  | 7.23  | 0.75  | 2.61  | 0.42 | 0.76  | 0.34 | 0.18  | 0.06 | 0.02 | 0.36 | 8.91   |
| LB04    | 2516 | 0.12 | 774  | 3824 | 7927  | 4.03  | 12.30 | 16.35 | 21.45 | 2.03  | 6.90  | 1.14 | 1.53  | 1.01 | 0.67  | 0.23 | 0.10 | 1.28 | 4.56   |
| cb101   | 2155 | 0.94 | 838  | 2873 | 10990 | 4.77  | 10.44 | 17.57 | 24.71 | 2.37  | 8.21  | 1.33 | 3.19  | 1.26 | 0.81  | 0.33 | 0.22 | 0.67 | 7.58   |
| cb102   | 2946 | 0.33 | 817  | 3346 | 7251  | 4.61  | 9.76  | 3.23  | 7.40  | 0.93  | 3.64  | 0.81 | 2.55  | 0.91 | 0.72  | 0.27 | 0.16 | 1.59 | 10.60  |
| cb103   | 2892 | 0.19 | 739  | 3631 | 6486  | 5.12  | 8.16  | 18.20 | 30.25 | 3.11  | 10.97 | 1.84 | 1.82  | 1.50 | 0.90  | 0.28 | 0.11 | 1.52 | 3.93   |
| cb104   | 2779 | 1.34 | 703  | 3525 | 8482  | 20.92 | 8.62  | 27.02 | 57.26 | 6.71  | 25.92 | 5.23 | 1.09  | 4.73 | 3.68  | 1.49 | 0.89 | 1.36 | 0.82   |
| cb105   | 2944 | 0.37 | 693  | 3653 | 10664 | 14.71 | 14.02 | 52.49 | 71.45 | 6.78  | 23.19 | 3.94 | 1.47  | 3.45 | 2.57  | 0.88 | 0.38 | 1.29 | 4.76   |
| cb106   | 3341 | 1.86 | 723  | 3307 | 6663  | 20.40 | 10.38 | 18.51 | 40.38 | 4.22  | 16.90 | 3.78 | 0.94  | 3.97 | 3.57  | 1.73 | 1.31 | 1.92 | 0.92   |
| cb107   | 3387 | 0.70 | 565  | 1364 | 12193 | 12.06 | 15.74 | 37.04 | 64.01 | 6.53  | 23.31 | 3.95 | 1.70  | 3.28 | 2.17  | 0.89 | 0.56 | 1.28 | 1.45   |
| cb108   | 2772 | 0.22 | 697  | 4066 | 8781  | 3.58  | 7.20  | 10.97 | 20.85 | 2.34  | 8.63  | 1.41 | 1.28  | 1.11 | 0.60  | 0.19 | 0.09 | 1.72 | 4.03   |
| cb109   | 3194 | 4.11 | 767  | 3911 | 8937  | 33.86 | 8.80  | 48.66 | 93.68 | 10.42 | 39.34 | 7.74 | 1.72  | 7.17 | 6.10  | 2.79 | 2.01 | 1.41 | 0.71   |
| cb110   | 3018 | 2.41 | 727  | 3539 | 8062  | 36.90 | 7.08  | 37.44 | 80.51 | 9.54  | 37.48 | 8.05 | 1.43  | 7.66 | 6.44  | 2.61 | 1.53 | 1.66 | 0.58   |
| cb203   | 3109 | 0.06 | 571  | 2257 | 12670 | 4.39  | 8.87  | 18.95 | 27.60 | 2.52  | 8.40  | 1.42 | 2.33  | 1.31 | 0.70  | 0.19 | 0.08 | 0.90 | 5.55   |
| cb203-2 | 2953 | 0.06 | 537  | 1326 | 14518 | 10.53 | 17.55 | 49.21 | 78.50 | 7.43  | 24.93 | 3.96 | 3.14  | 3.22 | 1.84  | 0.56 | 0.23 | 0.56 | 5.85   |
| cb204   | 3612 | 0.87 | 658  | 3564 | 11367 | 21.15 | 10.66 | 38.77 | 68.74 | 7.08  | 26.10 | 5.15 | 2.57  | 4.95 | 3.70  | 1.48 | 0.91 | 1.71 | 2.18   |
| cb205   | 3278 | 0.08 | 542  | 2461 | 7052  | 7.80  | 10.88 | 13.64 | 25.17 | 2.72  | 10.45 | 2.10 | 2.07  | 2.08 | 1.18  | 0.31 | 0.11 | 1.61 | 4.37   |
| cb208   | 3280 | 0.36 | 646  | 3018 | 9547  | 37.33 | 7.69  | 29.50 | 67.92 | 8.02  | 32.37 | 7.48 | 2.07  | 7.65 | 6.05  | 2.23 | 1.22 | 1.82 | 2.34   |
| cb209   | 3265 | 0.77 | 599  | 2816 | 8004  | 16.77 | 7.11  | 23.81 | 41.80 | 4.44  | 16.81 | 3.47 | 1.98  | 3.41 | 2.78  | 1.27 | 0.89 | 2.09 | 5.14   |
| cb210   | 2786 | 0.18 | 602  | 2508 | 8549  | 21.31 | 6.83  | 28.58 | 66.30 | 7.62  | 29.78 | 6.17 | 2.08  | 5.59 | 3.56  | 1.15 | 0.61 | 1.51 | 1.52   |
| cb211   | 3133 | 0.37 | 531  | 2454 | 9114  | 16.49 | 10.43 | 31.37 | 62.22 | 6.55  | 24.38 | 4.63 | 1.87  | 4.08 | 2.74  | 1.05 | 0.65 | 1.72 | 1.32   |
| 04\06   | 2904 | 1.40 | 554  | 4089 | 7551  | 18.19 | 3.31  | 19.51 | 44.01 | 5.33  | 21.02 | 4.53 | 1.38  | 4.22 | 3.20  | 1.16 | 0.65 | 1.21 | 0.96   |

|        |      |      |     |      |      |       |      |       |       |      |       |      |      |      |      |      |      |      |      |
|--------|------|------|-----|------|------|-------|------|-------|-------|------|-------|------|------|------|------|------|------|------|------|
| sp1    | 2614 | 0.33 | 155 | 2634 | 3855 | 3.06  | 1.20 | 6.73  | 13.63 | 1.59 | 5.85  | 0.97 | 0.45 | 0.79 | 0.50 | 0.18 | 0.11 | 0.25 | 1.66 |
| sp1-2  | 2474 | 1.89 | 203 | 2989 | 4182 | 6.04  | 1.88 | 12.17 | 21.44 | 2.37 | 8.76  | 1.50 | 0.68 | 1.26 | 1.08 | 0.55 | 0.44 | 0.33 | 1.50 |
| sp2    | 2706 | 1.59 | 181 | 2797 | 4150 | 8.17  | 1.40 | 10.60 | 23.13 | 2.84 | 10.92 | 2.05 | 0.46 | 1.78 | 1.51 | 0.69 | 0.46 | 0.26 | 0.78 |
| sp4    | 2992 | 0.50 | 226 | 3411 | 3428 | 3.79  | 1.48 | 4.49  | 9.18  | 1.13 | 4.45  | 0.89 | 0.78 | 0.84 | 0.64 | 0.26 | 0.17 | 0.78 | 3.16 |
| sp7    | 2803 | 2.53 | 203 | 3536 | 3660 | 8.84  | 1.82 | 15.61 | 35.79 | 4.34 | 15.81 | 2.61 | 1.11 | 2.02 | 1.50 | 0.67 | 0.49 | 0.30 | 1.65 |
| sp13   | 2631 | 0.23 | 189 | 2573 | 4710 | 6.67  | 4.43 | 9.06  | 20.32 | 2.49 | 9.73  | 1.81 | 0.46 | 1.63 | 1.15 | 0.44 | 0.23 | 0.34 | 0.82 |
| sp14   | 2855 | 0.36 | 177 | 2956 | 4337 | 3.96  | 1.71 | 12.54 | 22.33 | 2.46 | 8.68  | 1.33 | 0.68 | 1.05 | 0.67 | 0.24 | 0.13 | 0.18 | 2.09 |
| sp18   | 2819 | 0.35 | 130 | 1969 | 3459 | 1.64  | 2.36 | 4.24  | 7.30  | 0.78 | 2.78  | 0.45 | 0.25 | 0.40 | 0.25 | 0.10 | 0.06 | 0.32 | 2.02 |
| sp19   | 3263 | 1.38 | 137 | 3380 | 3547 | 4.85  | 1.41 | 10.19 | 18.58 | 2.06 | 7.26  | 1.26 | 0.40 | 1.07 | 0.82 | 0.36 | 0.25 | 0.25 | 1.11 |
| sp101  | 1706 | 0.11 | 253 | 2837 | 1952 | 1.44  | 1.05 | 0.57  | 1.64  | 0.29 | 1.53  | 0.40 | 0.47 | 0.35 | 0.21 | 0.07 | 0.03 | 0.39 | 4.04 |
| sp102  | 3174 | 1.12 | 232 | 3353 | 3963 | 8.90  | 1.65 | 9.25  | 21.10 | 2.67 | 10.85 | 2.14 | 0.62 | 1.91 | 1.59 | 0.74 | 0.52 | 0.18 | 0.94 |
| sp103  | 2558 | 0.49 | 280 | 3287 | 2967 | 2.85  | 0.86 | 1.42  | 3.83  | 0.63 | 3.11  | 0.71 | 0.65 | 0.67 | 0.45 | 0.17 | 0.09 | 0.45 | 3.93 |
| sp104  | 2840 | 0.72 | 247 | 3549 | 3288 | 2.68  | 1.07 | 1.86  | 4.08  | 0.56 | 2.41  | 0.55 | 0.51 | 0.54 | 0.45 | 0.20 | 0.14 | 0.81 | 5.09 |
| sp105  | 3131 | 0.90 | 229 | 3723 | 3751 | 17.73 | 1.53 | 9.02  | 25.15 | 3.78 | 17.47 | 4.19 | 0.71 | 3.86 | 3.11 | 1.21 | 0.67 | 0.18 | 0.62 |
| sp106  | 2596 | 0.99 | 361 | 4210 | 3291 | 9.90  | 1.46 | 7.57  | 17.46 | 2.45 | 10.47 | 2.30 | 2.10 | 2.05 | 1.65 | 0.70 | 0.46 | 0.44 | 3.00 |
| sp107  | 2773 | 0.57 | 403 | 4671 | 2782 | 8.91  | 1.89 | 4.54  | 13.61 | 2.22 | 10.38 | 2.47 | 1.04 | 2.11 | 1.50 | 0.52 | 0.28 | 0.37 | 2.03 |
| sp108  | 2604 | 1.48 | 308 | 3650 | 4571 | 10.14 | 1.75 | 13.81 | 34.56 | 4.72 | 19.37 | 3.56 | 2.29 | 2.67 | 1.83 | 0.71 | 0.41 | 0.42 | 2.39 |
| sp110  | 3144 | 0.40 | 254 | 4274 | 3066 | 6.67  | 0.78 | 5.17  | 15.06 | 2.18 | 9.33  | 1.93 | 1.10 | 1.65 | 1.17 | 0.40 | 0.19 | 0.45 | 1.96 |
| sp111  | 2397 | 0.51 | 214 | 3026 | 2606 | 4.51  | 3.40 | 3.56  | 9.54  | 1.38 | 5.87  | 1.21 | 0.48 | 1.05 | 0.73 | 0.27 | 0.14 | 0.30 | 1.31 |
| sp201  | 2825 | 0.80 | 221 | 2557 | 4330 | 7.62  | 1.80 | 9.02  | 20.39 | 2.70 | 11.32 | 2.24 | 0.76 | 1.86 | 1.18 | 0.40 | 0.21 | 0.28 | 1.55 |
| sp202  | 3145 | 0.26 | 209 | 2197 | 4329 | 2.22  | 1.19 | 4.71  | 9.63  | 1.03 | 3.71  | 0.65 | 0.36 | 0.53 | 0.34 | 0.12 | 0.06 | 0.21 | 2.06 |
| sp204  | 3405 | 0.18 | 168 | 2243 | 4047 | 1.30  | 1.69 | 3.02  | 5.76  | 0.64 | 2.34  | 0.40 | 0.21 | 0.32 | 0.20 | 0.07 | 0.05 | 0.29 | 1.87 |
| sp205  | 2737 | 0.48 | 198 | 2062 | 4972 | 4.00  | 1.77 | 12.86 | 23.22 | 2.51 | 8.78  | 1.38 | 0.52 | 1.04 | 0.65 | 0.24 | 0.14 | 0.07 | 1.37 |
| sp206  | 2984 | 0.57 | 160 | 1818 | 3159 | 1.66  | 1.11 | 3.29  | 5.51  | 0.57 | 2.06  | 0.37 | 0.14 | 0.33 | 0.28 | 0.14 | 0.12 | 0.16 | 1.50 |
| sp208  | 2082 | 0.27 | 210 | 2550 | 3920 | 5.18  | 1.35 | 2.63  | 7.01  | 1.14 | 5.33  | 1.27 | 0.80 | 1.18 | 0.84 | 0.30 | 0.14 | 0.08 | 2.15 |
| sp209  | 4643 | 5.77 | 226 | 3140 | 4301 | 22.98 | 1.33 | 13.72 | 42.56 | 6.37 | 27.47 | 5.95 | 1.18 | 5.09 | 4.23 | 1.87 | 1.26 | 0.07 | 0.69 |
| sp210  | 2632 | 0.34 | 204 | 2169 | 4039 | 1.98  | 1.08 | 1.21  | 3.16  | 0.44 | 1.91  | 0.41 | 0.30 | 0.40 | 0.33 | 0.13 | 0.09 | 0.03 | 2.32 |
| sp211  | 2511 | 0.41 | 277 | 3128 | 4046 | 5.50  | 1.25 | 10.10 | 24.93 | 3.18 | 12.19 | 2.02 | 0.94 | 1.54 | 0.96 | 0.36 | 0.22 | 0.08 | 1.63 |
| sp212  | 2718 | 0.25 | 240 | 3354 | 3426 | 3.10  | 0.43 | 3.51  | 8.82  | 1.19 | 4.89  | 0.90 | 0.76 | 0.74 | 0.53 | 0.19 | 0.08 | 0.21 | 3.68 |
| sp213  | 2728 | 2.15 | 260 | 3070 | 4710 | 11.55 | 1.82 | 10.46 | 25.98 | 3.52 | 14.43 | 2.94 | 1.00 | 2.58 | 2.09 | 0.90 | 0.60 | 0.11 | 1.18 |
| sp215  | 2640 | 0.23 | 245 | 2561 | 4003 | 4.94  | 1.20 | 9.12  | 17.51 | 2.22 | 8.53  | 1.47 | 1.02 | 1.20 | 0.79 | 0.30 | 0.15 | 0.05 | 3.50 |
| sp216  | 2181 | 0.99 | 133 | 829  | 1995 | 3.81  | 0.21 | 0.36  | 1.25  | 0.22 | 1.12  | 0.42 | 0.11 | 0.56 | 0.62 | 0.34 | 0.26 | 0.01 | 0.70 |
| sp216a | 2736 | 1.50 | 437 | 3726 | 3162 | 11.56 | 3.12 | 9.62  | 24.47 | 3.38 | 14.18 | 2.89 | 1.19 | 2.56 | 2.07 | 0.93 | 0.74 | 0.38 | 1.65 |
| sp218  | 2914 | 0.80 | 157 | 2534 | 3609 | 3.05  | 1.24 | 5.69  | 9.52  | 1.05 | 3.84  | 0.73 | 0.42 | 0.63 | 0.52 | 0.22 | 0.18 | 0.37 | 3.52 |

|         |      |      |      |      |       |       |       |       |       |      |       |       |      |       |      |      |      |      |       |
|---------|------|------|------|------|-------|-------|-------|-------|-------|------|-------|-------|------|-------|------|------|------|------|-------|
| sp219   | 2696 | 0.54 | 213  | 2661 | 3889  | 5.47  | 0.82  | 11.83 | 19.12 | 2.04 | 7.31  | 1.36  | 1.62 | 1.21  | 0.82 | 0.28 | 0.14 | 0.34 | 4.35  |
| sp220   | 3188 | 1.65 | 172  | 2063 | 6927  | 3.32  | 1.36  | 4.22  | 8.53  | 0.95 | 3.55  | 0.71  | 0.22 | 0.63  | 0.56 | 0.30 | 0.27 | 0.09 | 0.98  |
| sp221   | 3157 | 0.48 | 132  | 1766 | 5504  | 1.13  | 1.50  | 1.76  | 3.33  | 0.36 | 1.35  | 0.26  | 0.13 | 0.22  | 0.18 | 0.09 | 0.07 | 0.10 | 3.09  |
| sp222   | 3152 | 0.11 | 133  | 1469 | 7520  | 0.78  | 1.07  | 2.69  | 4.24  | 0.43 | 1.48  | 0.25  | 0.14 | 0.19  | 0.12 | 0.04 | 0.02 | 0.07 | 1.98  |
| sp223   | 3177 | 0.84 | 173  | 1698 | 9776  | 2.89  | 2.27  | 3.16  | 5.92  | 0.66 | 2.51  | 0.52  | 0.26 | 0.52  | 0.48 | 0.25 | 0.22 | 0.07 | 2.05  |
| sp224   | 2379 | 1.23 | 187  | 1694 | 5272  | 4.42  | 2.74  | 5.65  | 12.28 | 1.46 | 5.64  | 1.09  | 0.32 | 0.93  | 0.75 | 0.33 | 0.24 | 0.11 | 1.22  |
| cf1     | 2771 | 0.02 | 185  | 2592 | 3343  | 0.10  | 1.69  | 0.44  | 0.65  | 0.07 | 0.25  | 0.04  | 0.26 | 0.03  | 0.01 | 0.00 | 0.00 | 0.14 | 26.94 |
| s1      | 2325 | 3.81 | 1660 | 4383 | 5192  | 41.62 | 1.53  | 15.98 | 46.48 | 7.74 | 41.62 | 13.46 | 8.48 | 12.43 | 8.45 | 2.85 | 1.73 | 0.83 | 2.00  |
| sm62    | 1954 | 1.50 | 115  | 2079 | 1983  | 5.35  | 1.51  | 4.84  | 11.20 | 1.41 | 5.56  | 1.15  | 0.21 | 1.04  | 0.94 | 0.44 | 0.30 | 0.16 | 0.57  |
| sm67    | 2929 | 7.23 | 331  | 3747 | 4126  | 27.68 | 0.80  | 19.67 | 51.82 | 6.97 | 28.97 | 5.95  | 0.81 | 5.48  | 5.22 | 2.59 | 1.92 | 0.29 | 0.43  |
| sm78    | 3063 | 1.62 | 149  | 2603 | 3158  | 5.22  | 0.88  | 13.92 | 24.85 | 2.68 | 9.32  | 1.46  | 0.38 | 1.16  | 0.91 | 0.40 | 0.31 | 0.10 | 0.90  |
| sm81    | 2634 | 1.36 | 191  | 3053 | 4244  | 10.36 | 1.10  | 18.77 | 38.79 | 4.45 | 16.13 | 2.81  | 0.66 | 2.32  | 1.91 | 0.83 | 0.54 | 0.06 | 0.74  |
| sm84    | 2896 | 1.84 | 127  | 3100 | 3582  | 6.90  | 0.95  | 15.48 | 28.18 | 3.12 | 11.05 | 1.90  | 0.44 | 1.54  | 1.25 | 0.62 | 0.48 | 0.18 | 0.81  |
| sm94    | 2577 | 1.94 | 196  | 3462 | 2695  | 9.70  | 1.73  | 7.12  | 19.37 | 2.57 | 10.59 | 2.19  | 0.51 | 2.03  | 1.73 | 0.75 | 0.48 | 0.21 | 0.80  |
| cj101   | 3239 | 0.06 | 83   | 288  | 3796  | 0.24  | 1.26  | 0.48  | 0.83  | 0.09 | 0.32  | 0.06  | 0.08 | 0.05  | 0.03 | 0.01 | 0.00 | 0.12 | 4.41  |
| cj102   | 3019 | 1.40 | 173  | 1704 | 6821  | 3.90  | 13.66 | 7.21  | 16.46 | 2.05 | 7.66  | 1.32  | 0.66 | 1.06  | 0.75 | 0.31 | 0.21 | 0.17 | 2.65  |
| cj104   | 3157 | 0.65 | 44   | 331  | 10072 | 1.50  | 1.48  | 2.02  | 4.41  | 0.54 | 2.04  | 0.37  | 0.10 | 0.32  | 0.26 | 0.12 | 0.10 | 0.08 | 0.93  |
| cj105   | 2507 | 0.21 | 27   | 133  | 6562  | 0.76  | 1.23  | 1.04  | 1.95  | 0.22 | 0.80  | 0.15  | 0.04 | 0.13  | 0.12 | 0.06 | 0.04 | 0.13 | 1.29  |
| cj106   | 3137 | 0.11 | 29   | 129  | 7744  | 0.67  | 1.40  | 1.79  | 3.08  | 0.33 | 1.12  | 0.17  | 0.06 | 0.14  | 0.08 | 0.03 | 0.01 | 0.06 | 1.25  |
| cj107   | 1640 | 0.13 | 34   | 63   | 3473  | 0.41  | 0.12  | 0.20  | 0.52  | 0.07 | 0.31  | 0.07  | 0.01 | 0.07  | 0.06 | 0.03 | 0.03 | 0.14 | 0.52  |
| cj108   | 2790 | 1.44 | 35   | 239  | 4077  | 4.26  | 1.11  | 10.38 | 17.40 | 1.87 | 6.61  | 1.09  | 0.15 | 0.94  | 0.77 | 0.39 | 0.31 | 0.26 | 0.48  |
| cj109   | 3334 | 0.58 | 74   | 781  | 3813  | 2.42  | 1.56  | 4.03  | 7.84  | 0.92 | 3.33  | 0.59  | 0.20 | 0.52  | 0.40 | 0.17 | 0.11 | 0.16 | 1.46  |
| cj110   | 3089 | 0.25 | 91   | 991  | 3276  | 1.40  | 0.97  | 3.41  | 6.27  | 0.71 | 2.48  | 0.40  | 0.17 | 0.33  | 0.20 | 0.07 | 0.04 | 0.07 | 1.58  |
| cj110b  | 3383 | 0.50 | 39   | 165  | 7701  | 1.12  | 0.76  | 1.29  | 2.62  | 0.32 | 1.19  | 0.24  | 0.07 | 0.22  | 0.19 | 0.09 | 0.06 | 0.06 | 1.01  |
| cj111   | 3095 | 0.21 | 44   | 85   | 8878  | 0.74  | 1.60  | 3.94  | 5.83  | 0.58 | 1.93  | 0.26  | 0.10 | 0.20  | 0.10 | 0.04 | 0.02 | 0.11 | 1.42  |
| cj112   | 3680 | 1.15 | 76   | 444  | 7571  | 3.46  | 4.75  | 9.30  | 15.44 | 1.63 | 5.67  | 0.98  | 0.33 | 0.77  | 0.57 | 0.25 | 0.19 | 0.41 | 1.16  |
| cj113   | 4893 | 0.21 | 61   | 283  | 5221  | 1.67  | 1.64  | 5.91  | 10.65 | 1.07 | 3.62  | 0.57  | 0.23 | 0.44  | 0.20 | 0.05 | 0.02 | 0.08 | 1.47  |
| cj114   | 2965 | 3.12 | 58   | 264  | 4266  | 4.94  | 1.93  | 4.00  | 8.84  | 1.06 | 4.20  | 0.88  | 0.18 | 0.90  | 0.95 | 0.58 | 0.56 | 0.13 | 0.60  |
| cj115   | 2745 | 1.52 | 63   | 211  | 4283  | 3.43  | 1.81  | 2.83  | 6.38  | 0.74 | 2.88  | 0.63  | 0.13 | 0.59  | 0.56 | 0.30 | 0.26 | 0.29 | 0.73  |
| cj116   | 3393 | 0.14 | 155  | 272  | 3764  | 1.11  | 1.46  | 0.99  | 1.97  | 0.24 | 0.94  | 0.19  | 0.31 | 0.20  | 0.13 | 0.03 | 0.01 | 0.04 | 4.83  |
| cj117   | 2101 | 0.07 | 39   | 45   | 1942  | 0.65  | 0.37  | 0.71  | 1.08  | 0.11 | 0.42  | 0.08  | 0.01 | 0.09  | 0.08 | 0.05 | 0.03 | 0.02 | 0.53  |
| cj118   | 3040 | 0.25 | 40   | 58   | 12088 | 1.14  | 1.08  | 1.04  | 1.77  | 0.22 | 0.85  | 0.18  | 0.06 | 0.20  | 0.19 | 0.11 | 0.08 | 0.17 | 1.22  |
| cj119   | 3035 | 1.42 | 73   | 85   | 7438  | 3.42  | 1.10  | 7.04  | 12.84 | 1.37 | 5.05  | 0.88  | 0.21 | 0.73  | 0.60 | 0.30 | 0.26 | 0.04 | 0.80  |
| cj119-2 | 3006 | 1.54 | 75   | 103  | 6797  | 3.20  | 1.11  | 6.35  | 11.28 | 1.23 | 4.45  | 0.80  | 0.18 | 0.67  | 0.56 | 0.28 | 0.23 | 0.03 | 0.77  |

|       |      |      |     |      |      |       |      |       |       |      |       |      |      |      |      |      |      |      |      |
|-------|------|------|-----|------|------|-------|------|-------|-------|------|-------|------|------|------|------|------|------|------|------|
| cj11b | 2586 | 0.20 | 70  | 972  | 6043 | 0.80  | 0.86 | 1.42  | 2.75  | 0.29 | 1.04  | 0.20 | 0.12 | 0.17 | 0.11 | 0.05 | 0.03 | 0.07 | 2.23 |
| cj120 | 3453 | 0.86 | 67  | 169  | 4431 | 2.67  | 0.70 | 3.93  | 8.21  | 0.96 | 3.50  | 0.69 | 0.18 | 0.59 | 0.45 | 0.19 | 0.13 | 0.09 | 0.88 |
| cj121 | 2809 | 0.10 | 105 | 62   | 6047 | 1.51  | 0.58 | 0.65  | 1.59  | 0.21 | 0.91  | 0.24 | 0.22 | 0.26 | 0.20 | 0.06 | 0.03 | 0.06 | 2.67 |
| cj122 | 3453 | 0.17 | 42  | 68   | 5775 | 0.79  | 1.47 | 6.99  | 9.03  | 0.84 | 2.61  | 0.32 | 0.17 | 0.23 | 0.12 | 0.04 | 0.02 | 0.11 | 1.93 |
| cj123 | 2978 | 0.64 | 46  | 96   | 7268 | 1.52  | 2.00 | 4.18  | 7.34  | 0.76 | 2.52  | 0.39 | 0.11 | 0.31 | 0.24 | 0.11 | 0.09 | 0.06 | 1.00 |
| cj126 | 3074 | 0.63 | 261 | 3369 | 4411 | 3.47  | 0.88 | 4.79  | 10.19 | 1.34 | 5.23  | 0.96 | 1.17 | 0.84 | 0.56 | 0.22 | 0.12 | 0.19 | 5.27 |
| cj126 | 3070 | 0.27 | 253 | 4080 | 4449 | 2.24  | 0.90 | 9.25  | 16.61 | 1.96 | 6.73  | 1.00 | 1.37 | 0.74 | 0.36 | 0.10 | 0.05 | 0.24 | 4.97 |
| cj127 | 3403 | 5.91 | 141 | 2201 | 5653 | 18.70 | 2.69 | 10.04 | 26.95 | 3.85 | 16.12 | 3.68 | 0.35 | 3.57 | 3.58 | 1.89 | 1.60 | 0.17 | 0.32 |
| cj129 | 3082 | 0.05 | 35  | 41   | 4794 | 0.17  | 2.16 | 0.41  | 0.74  | 0.08 | 0.30  | 0.06 | 0.03 | 0.05 | 0.03 | 0.01 | 0.01 | 0.02 | 1.96 |
| cj132 | 3076 | 0.38 | 55  | 44   | 4901 | 1.17  | 3.66 | 2.27  | 4.02  | 0.45 | 1.59  | 0.28 | 0.17 | 0.24 | 0.19 | 0.08 | 0.06 | 0.04 | 2.00 |
| cj201 | 2226 | 0.21 | 70  | 449  | 2593 | 0.77  | 0.58 | 1.83  | 3.07  | 0.33 | 1.17  | 0.19 | 0.15 | 0.17 | 0.10 | 0.04 | 0.02 | 0.08 | 2.89 |
| cj202 | 2832 | 0.58 | 77  | 989  | 3426 | 1.35  | 1.05 | 1.80  | 3.23  | 0.37 | 1.38  | 0.26 | 0.17 | 0.27 | 0.23 | 0.11 | 0.09 | 0.36 | 3.62 |
| cj2   | 2638 | 0.20 | 74  | 862  | 5701 | 0.88  | 1.25 | 1.49  | 2.81  | 0.29 | 1.06  | 0.19 | 0.11 | 0.17 | 0.12 | 0.05 | 0.03 | 0.05 | 1.87 |
| cj4   | 2468 | 0.21 | 71  | 802  | 5160 | 1.18  | 0.81 | 2.38  | 4.00  | 0.40 | 1.39  | 0.26 | 0.15 | 0.24 | 0.16 | 0.07 | 0.04 | 0.06 | 1.89 |
| cj4b  | 1488 | 0.09 | 41  | 92   | 1485 | 1.45  | 0.28 | 1.34  | 2.28  | 0.25 | 1.00  | 0.22 | 0.08 | 0.27 | 0.20 | 0.10 | 0.06 | 0.02 | 1.05 |
| cj9a  | 3545 | 1.51 | 138 | 1784 | 4852 | 6.36  | 2.73 | 6.33  | 14.66 | 1.80 | 6.93  | 1.41 | 0.33 | 1.27 | 1.12 | 0.48 | 0.33 | 0.29 | 0.85 |
| cj14  | 2167 | 0.84 | 49  | 514  | 7376 | 1.91  | 1.61 | 4.17  | 7.99  | 0.88 | 3.11  | 0.53 | 0.13 | 0.41 | 0.32 | 0.16 | 0.12 | 0.31 | 0.95 |
| cj22  | 2778 | 0.14 | 51  | 643  | 5217 | 0.63  | 2.06 | 1.99  | 3.32  | 0.35 | 1.22  | 0.21 | 0.13 | 0.15 | 0.09 | 0.03 | 0.02 | 0.21 | 2.37 |
| cj23  | 2547 | 0.36 | 62  | 701  | 4289 | 0.93  | 0.76 | 1.17  | 2.27  | 0.25 | 0.93  | 0.20 | 0.09 | 0.17 | 0.14 | 0.07 | 0.05 | 0.22 | 1.62 |
| cj25  | 1894 | 0.09 | 51  | 488  | 4842 | 0.57  | 1.69 | 1.87  | 3.50  | 0.38 | 1.29  | 0.19 | 0.06 | 0.15 | 0.09 | 0.04 | 0.02 | 0.24 | 1.26 |
| cj45c | 3077 | 1.31 | 102 | 1051 | 4505 | 9.41  | 1.41 | 8.37  | 21.05 | 2.68 | 10.82 | 2.24 | 0.40 | 2.04 | 1.65 | 0.61 | 0.35 | 0.12 | 0.67 |
| sm104 | 3236 | 1.82 | 67  | 263  | 4424 | 2.94  | 1.00 | 3.96  | 5.51  | 0.58 | 2.22  | 0.45 | 0.23 | 0.48 | 0.49 | 0.27 | 0.21 | 0.02 | 2.82 |
| sm5   | 2811 | 1.70 | 70  | 716  | 3140 | 20.51 | 1.77 | 16.10 | 22.92 | 3.21 | 12.60 | 2.41 | 0.63 | 2.54 | 2.55 | 1.50 | 1.31 | 0.01 | 0.78 |
| bl101 | 2373 | 2.89 | 278 | 2717 | 4309 | 15.02 | 1.05 | 27.35 | 58.42 | 7.04 | 25.28 | 4.15 | 1.73 | 3.42 | 2.69 | 1.13 | 0.80 | 0.08 | 1.41 |
| bl102 | 2781 | 1.53 | 307 | 3920 | 4025 | 6.11  | 1.02 | 4.11  | 9.94  | 1.47 | 6.67  | 1.54 | 0.79 | 1.38 | 1.06 | 0.45 | 0.30 | 0.09 | 1.62 |
| bl15  | 2839 | 0.87 | 471 | 3491 | 3185 | 14.39 | 1.83 | 11.16 | 33.07 | 4.79 | 20.25 | 4.10 | 1.26 | 3.53 | 2.49 | 0.94 | 0.54 | 0.39 | 1.09 |
| bl17  | 1869 | 0.02 | 364 | 2812 | 2136 | 0.61  | 1.72 | 1.39  | 2.96  | 0.37 | 1.41  | 0.23 | 0.41 | 0.20 | 0.08 | 0.02 | 0.01 | 0.16 | 6.14 |
| bl20  | 2311 | 2.69 | 492 | 4102 | 1786 | 25.10 | 1.59 | 7.80  | 27.25 | 5.04 | 25.88 | 6.45 | 1.44 | 5.61 | 4.46 | 1.87 | 1.22 | 0.22 | 0.78 |
| bl21  | 2493 | 0.86 | 398 | 4242 | 1899 | 16.07 | 3.46 | 9.11  | 26.34 | 4.25 | 19.85 | 4.35 | 1.21 | 3.76 | 2.65 | 0.98 | 0.51 | 0.19 | 0.96 |
| bl22  | 2484 | 0.88 | 468 | 5787 | 1826 | 20.04 | 2.06 | 7.76  | 26.94 | 5.10 | 26.20 | 6.46 | 1.57 | 5.61 | 3.55 | 1.12 | 0.55 | 0.18 | 1.25 |
| bl23  | 2656 | 2.40 | 473 | 4390 | 2647 | 16.45 | 1.47 | 5.36  | 18.21 | 3.22 | 15.81 | 3.88 | 0.93 | 3.52 | 2.88 | 1.22 | 0.78 | 0.33 | 1.07 |
| bl1   | 2665 | 0.27 | 358 | 4101 | 2207 | 3.52  | 1.76 | 3.64  | 7.72  | 1.00 | 4.08  | 0.86 | 0.40 | 0.82 | 0.58 | 0.21 | 0.11 | 0.12 | 2.56 |
| bl3   | 1230 | 0.08 | 381 | 1715 | 2216 | 1.31  | 1.03 | 0.25  | 0.55  | 0.12 | 0.74  | 0.16 | 0.08 | 0.20 | 0.11 | 0.06 | 0.04 | 0.02 | 1.36 |
| bl4   | 1923 | 0.64 | 367 | 4787 | 1812 | 9.83  | 0.90 | 0.95  | 2.65  | 0.55 | 3.42  | 0.99 | 0.36 | 1.33 | 1.24 | 0.78 | 0.52 | 0.02 | 0.99 |

|       |      |      |     |      |      |       |       |      |       |      |       |      |      |      |      |      |      |      |      |
|-------|------|------|-----|------|------|-------|-------|------|-------|------|-------|------|------|------|------|------|------|------|------|
| bl4a  | 1163 | 0.24 | 316 | 2921 | 3276 | 2.38  | 0.87  | 0.56 | 1.76  | 0.34 | 1.96  | 0.41 | 0.11 | 0.42 | 0.29 | 0.16 | 0.10 | 0.03 | 0.80 |
| bl5   | 2399 | 0.17 | 407 | 4216 | 1940 | 5.79  | 1.89  | 6.69 | 18.43 | 2.74 | 11.74 | 2.16 | 0.75 | 1.73 | 0.89 | 0.25 | 0.10 | 0.34 | 1.34 |
| 18/3  | 3405 | 0.28 | 343 | 2955 | 5907 | 1.50  | 3.68  | 5.15 | 8.75  | 0.90 | 2.95  | 0.44 | 0.66 | 0.36 | 0.25 | 0.10 | 0.07 | 0.24 | 6.18 |
| 18/9  | 3350 | 1.01 | 104 | 1816 | 4845 | 6.09  | 2.86  | 5.22 | 10.52 | 1.25 | 4.78  | 0.98 | 0.31 | 0.97 | 0.94 | 0.46 | 0.32 | 0.17 | 1.27 |
| R-11  | 2329 | 0.03 | 46  | 51   | 4239 | 1.19  | 2.56  | 1.20 | 2.18  | 0.25 | 0.93  | 0.17 | 0.13 | 0.18 | 0.14 | 0.06 | 0.03 | 0.01 | 2.23 |
| w13b  | 3828 | 0.07 | 353 | 2650 | 6762 | 1.93  | 5.73  | 5.49 | 9.13  | 0.93 | 3.28  | 0.57 | 0.40 | 0.49 | 0.28 | 0.11 | 0.06 | 1.10 | 2.08 |
| w13b  | 2478 | 0.12 | 431 | 3324 | 8699 | 3.05  | 6.54  | 7.74 | 13.99 | 1.47 | 5.10  | 0.90 | 0.49 | 0.82 | 0.49 | 0.17 | 0.08 | 0.98 | 1.99 |
| w13c  | 3139 | 0.19 | 463 | 3210 | 638  | 3.44  | 4.58  | 5.79 | 11.11 | 1.18 | 4.45  | 0.86 | 0.34 | 0.84 | 0.54 | 0.20 | 0.10 | 1.04 | 1.28 |
| w2    | 2735 | 0.78 | 60  | 519  | 2881 | 10.62 | 2.20  | 9.06 | 14.28 | 1.95 | 7.52  | 1.40 | 0.36 | 1.41 | 1.21 | 0.63 | 0.44 | 0.07 | 0.82 |
| w2a   | 1697 | 0.14 | 152 | 1492 | 3193 | 1.39  | 31.97 | 0.60 | 1.19  | 0.15 | 0.62  | 0.15 | 0.03 | 0.17 | 0.18 | 0.12 | 0.09 | 0.02 | 0.68 |
| w2d   | 1860 | 0.09 | 161 | 1727 | 3396 | 1.28  | 27.26 | 0.40 | 0.93  | 0.13 | 0.58  | 0.13 | 0.03 | 0.16 | 0.15 | 0.09 | 0.06 | 0.01 | 0.63 |
| w2d-2 | 1770 | 0.14 | 149 | 1452 | 3327 | 1.74  | 29.22 | 0.45 | 0.91  | 0.12 | 0.57  | 0.14 | 0.04 | 0.20 | 0.21 | 0.14 | 0.11 | 0.05 | 0.68 |
| w2d-3 | 1859 | 0.05 | 133 | 1577 | 3000 | 0.72  | 16.31 | 0.14 | 0.35  | 0.05 | 0.23  | 0.06 | 0.02 | 0.08 | 0.08 | 0.05 | 0.04 | 0.01 | 0.79 |
| w4    | 2239 | 0.10 | 58  | 731  | 2070 | 1.93  | 1.24  | 2.87 | 3.31  | 0.45 | 1.62  | 0.26 | 0.16 | 0.26 | 0.20 | 0.08 | 0.05 | 0.02 | 3.16 |
