# Supplementary material
Source: publisher figshare collection journal article supplement (https://geolsoc.figshare.com/articles/dataset/_/3452957)
Supplement: Supplementary file 2 [file 1]

| Sample  | Host rock | Location | Easting | Northing | Type | Ht. (m) | d13C  | d18O  | Sr      | Sr error |
|---------|-----------|----------|---------|----------|------|---------|-------|-------|---------|----------|
| c1      | CBL       | Tate St  | 63162   | 34543    | F    | 30      | 1.29  | 17.76 | 0.70833 | 0.00003  |
| c10     | CBL       | Tate St  | 63162   | 34543    | E    | 20      | 1.37  | 17.95 |         |          |
| c12     | CBL       | Tate St  | 63162   | 34543    | E    | 20      | 0.70  | 17.88 | 0.70832 | 0.00002  |
| c13     | CBL       | Tate St  | 63162   | 34543    | B    | 20      | 0.59  | 17.51 | 0.70832 | 0.00001  |
| c16     | CBL       | Tate St  | 63162   | 34543    | B    | 20      | -0.70 | 17.28 | 0.70830 | 0.00002  |
| c23     | CBL       | Tate St  | 63199   | 31328    | B    | -15     | -0.86 | 4.36  | 0.70820 | 0.00002  |
| c27     | CBL       | Tate St  | 63156   | 34124    | E    | 0       | 1.21  | 0.76  | 0.70825 | 0.00005  |
| c27a    | CBL       | Tate St  | 63156   | 34124    | B    | 0       | 1.21  | 0.76  | 0.70825 | 0.00005  |
| c2a     | CBL       | Tate St  | 63227   | 31332    | E    | 10      | -8.39 | 14.09 | 0.70897 | 0.00002  |
| ts15    | CBL       | Tate St  | 62860   | 32405    | E    | 22.2    | 0.50  | 9.30  | 0.70831 | 0.00001  |
| ts20    | CBL       | Tate St  | 62860   | 32405    | E    | 25      | 0.72  | 17.40 |         |          |
| ts32    | CBL       | Tate St  | 62860   | 32405    | E    | 35      | 1.34  | 17.78 |         |          |
| ts37    | CBL       | Tate St  | 62860   | 32405    | E    | 30      | 1.16  | 17.80 |         |          |
| LB04    | CBL       | TSFFC    | 62845   | 32450    | E    | 30      | 0.73  | 17.12 | 0.70834 | 0.00002  |
| cb101   | CBL       | TSFFC    | 62845   | 32450    | B    | 30      | 0.02  | 15.51 | 0.70825 | 0.00001  |
| cb102   | CBL       | TSFFC    | 62845   | 32450    | B    | 31      | 0.89  | 17.96 | 0.70833 | 0.00002  |
| cb103   | CBL       | TSFFC    | 62845   | 32450    | B    | 32      | 1.10  | 17.37 | 0.70835 | 0.00002  |
| cb104   | CBL       | TSFFC    | 62845   | 32450    | B    | 26      | 1.05  | 17.79 | 0.70835 | 0.00002  |
| cb105   | CBL       | TSFFC    | 62845   | 32450    | E    | 27      | 0.95  | 16.51 | 0.70831 | 0.00001  |
| cb106   | CBL       | TSFFC    | 62845   | 32450    | E    | 28      | 1.05  | 18.07 | 0.70831 | 0.00002  |
| cb107   | CBL       | TSFFC    | 62845   | 32450    | E    | 27      | 0.90  | 18.64 | 0.70835 | 0.00001  |
| cb108   | CBL       | TSFFC    | 62785   | 32535    | B    | 30      | -0.17 | 19.56 | 0.70839 | 0.00002  |
| cb109   | CBL       | TSFFC    | 62795   | 32500    | F    | 32      | 1.19  | 17.84 | 0.70831 | 0.00004  |
| cb110   | CBL       | TSFFC    | 62790   | 32530    | B    | 32      | 1.17  | 18.25 | 0.70834 | 0.00002  |
| cb203   | CBL       | TSFFC    | 62839   | 32422    | E    | 31      |       |       |         |          |
| cb203-2 | CBL       | TSFFC    | 62839   | 32422    | E    | 31      |       |       |         |          |
| cb204   | CBL       | TSFFC    | 62839   | 32422    | E    | 31      |       |       | 0.70835 | 0.00001  |
| cb205   | CBL       | TSFFC    | 62839   | 32422    | E    | 27      |       |       | 0.70834 | 0.00002  |
| cb208   | CBL       | TSFFC    | 62839   | 32422    | E    | 27      |       |       | 0.70835 | 0.00001  |
| cb209   | CBL       | TSFFC    | 62839   | 32422    | E    | 27      |       |       | 0.70835 | 0.00001  |
| cb210   | CBL       | TSFFC    | 62839   | 32422    | E    | 31      |       |       | 0.70834 | 0.00002  |
| cb211   | CBL       | TSFFC    | 62839   | 32422    | E    | 31      |       |       | 0.70835 | 0.00001  |
| 04\06   | CBL       | Tate St  | 63325   | 34590    | F    | 80      |       |       |         |          |

|        |     |           |       |       |   |        |      |       |         |         |
|--------|-----|-----------|-------|-------|---|--------|------|-------|---------|---------|
| sp1    | SYL | E end SM  | 66201 | 29311 | F | 302    |      |       |         |         |
| sp1-2  | SYL | E end SM  | 66201 | 29311 | F | 302    |      |       |         |         |
| sp2    | SYL | E end SM  | 66201 | 29311 | F | 302    |      |       |         |         |
| sp4    | SYL | E end SM  | 66201 | 29311 | F | 304.5  |      |       |         |         |
| sp7    | SYL | E end SM  | 66201 | 29311 | F | 303    |      |       |         |         |
| sp13   | SYL | E end SM  | 66201 | 29311 | E | 298    |      |       |         |         |
| sp14   | SYL | E end SM  | 66201 | 29311 | F | 298    |      |       |         |         |
| sp18   | SYL | E end SM  | 66201 | 29311 | E | 298    |      |       |         |         |
| sp19   | SYL | E end SM  | 66201 | 29311 | E | 298    |      |       |         |         |
| sp101  | SYL | Roo Flat  | 64640 | 31350 | B | 300    | 0.96 | 22.40 | 0.70852 | 0.00002 |
| sp102  | SYL | Roo Flat  | 64641 | 31350 | B | 300    | 0.69 | 22.63 | 0.70852 | 0.00001 |
| sp103  | SYL | Roo Flat  | 64642 | 31350 | B | 300    | 0.89 | 22.45 | 0.70852 | 0.00002 |
| sp104  | SYL | Roo Flat  | 64643 | 31350 | F | 300    | 0.80 | 22.49 | 0.70849 | 0.00002 |
| sp105  | SYL | Roo Flat  | 64644 | 31350 | F | 300    | 0.76 | 22.54 | 0.70851 | 0.00002 |
| sp106  | SYL | Roo Flat  | 64645 | 31350 | E | 300    | 0.98 | 22.36 |         |         |
| sp107  | SYL | Roo Flat  | 64646 | 31350 | B | 300    | 1.02 | 22.35 | 0.70857 | 0.00002 |
| sp108  | SYL | Roo Flat  | 64647 | 31350 | E | 300    | 0.85 | 20.68 | 0.70845 | 0.00001 |
| sp110  | SYL | Roo Flat  | 64648 | 31350 | E | 300    | 0.94 | 22.36 | 0.70854 | 0.00002 |
| sp111  | SYL | Roo Flat  | 64649 | 31350 | E | 300    | 0.74 | 21.10 |         |         |
| sp201  | SYL | Roo Flat  | 64653 | 31379 | F | 290    | 0.86 | 23.04 | 0.70836 | 0.00002 |
| sp202  | SYL | Roo Flat  | 64654 | 31379 | E | 290    | 0.87 | 23.09 | 0.70835 | 0.00002 |
| sp204  | SYL | Roo Flat  | 64655 | 31379 | F | 290    |      |       | 0.70842 | 0.00002 |
| sp205  | SYL | Roo Flat  | 64656 | 31379 | B | 290    | 0.69 | 22.75 | 0.70837 | 0.00001 |
| sp206  | SYL | Roo Flat  | 64657 | 31379 | E | 286.25 | 0.78 | 22.77 | 0.70837 | 0.00002 |
| sp208  | SYL | Roo Flat  | 64658 | 31345 | F | 275    | 0.60 | 21.97 | 0.70838 | 0.00001 |
| sp209  | SYL | Roo Flat  | 64659 | 31345 | F | 275    | 0.63 | 21.96 | 0.70836 | 0.00001 |
| sp210  | SYL | Roo Flat  | 64660 | 31345 | F | 275    | 0.67 | 22.65 | 0.70836 | 0.00001 |
| sp211  | SYL | Roo Flat  | 64661 | 31345 | F | 275    | 0.69 | 22.48 | 0.70847 | 0.00002 |
| sp212  | SYL | Roo Flat  | 64662 | 31345 | F | 275    |      |       | 0.70858 | 0.00001 |
| sp213  | SYL | Roo Flat  | 64663 | 31345 | F | 275    | 0.60 | 22.69 | 0.70842 | 0.00001 |
| sp215  | SYL | Roo Flat  | 64664 | 31345 | B | 275    | 1.37 | 25.46 | 0.70841 | 0.00002 |
| sp216  | SYL | Roo Flat  | 64665 | 31345 | F | 275    | 1.03 | 14.70 | 0.70853 | 0.00002 |
| sp216a | SYL | Roo Flat  | 64666 | 31345 | F | 275    |      |       | 0.70839 | 0.00003 |
| sp218  | SYL | N side SM | 65950 | 29340 | F | 275    | 1.00 | 22.39 | 0.70844 | 0.00002 |

|         |     |           |       |       |   |     |       |       |         |         |
|---------|-----|-----------|-------|-------|---|-----|-------|-------|---------|---------|
| sp219   | SYL | N side SM | 65950 | 29340 | F | 315 | 0.69  | 22.22 |         |         |
| sp220   | SYL | N side SM | 65950 | 29340 | E | 315 | 0.79  | 22.61 | 0.70832 | 0.00001 |
| sp221   | SYL | N side SM | 65950 | 29340 | E | 315 | 0.70  | 22.02 | 0.70834 | 0.00002 |
| sp222   | SYL | N side SM | 65950 | 29340 | B | 315 | 0.76  | 22.70 | 0.70830 | 0.00002 |
| sp223   | SYL | N side SM | 65950 | 29340 | F | 315 | 0.41  | 22.57 | 0.70836 | 0.00001 |
| sp224   | SYL | N side SM | 65950 | 29340 | F | 315 | -0.72 | 23.30 | 0.70842 | 0.00001 |
| cf1     | SYL | S side SM | 65950 | 29340 |   | 310 | 1.00  | 22.50 | 0.70845 | 0.00001 |
| s1      | SYL | S side SM | 64372 | 30342 | B | 260 | 0.02  | 20.90 |         |         |
| sm62    | SYL | S side SM | 65616 | 28826 | B | 275 | 0.86  | 21.38 | 0.70852 | 0.00004 |
| sm67    | SYL | S side SM | 65720 | 28850 | E | 275 | 0.80  | 21.59 | 0.70852 | 0.00002 |
| sm78    | SYL | S side SM | 66120 | 28870 | F | 293 | 0.99  | 22.96 | 0.70844 | 0.00002 |
| sm81    | SYL | S side SM | 66120 | 28870 | F | 293 | 0.77  | 22.75 | 0.70841 | 0.00001 |
| sm84    | SYL | S side SM | 66120 | 28870 | E | 295 | 1.17  | 22.44 |         |         |
| sm94    | SYL | S side SM | 66120 | 28870 | F | 285 | 1.01  | 22.26 | 0.70854 | 0.00002 |
| cj101   | CJL | Roo Flat  | 64655 | 31413 | E | 405 | 1.18  | 23.95 | 0.70823 | 0.00001 |
| cj102   | CJL | Roo Flat  | 64656 | 31413 | B | 400 | 0.22  | 24.22 | 0.70830 | 0.00001 |
| cj104   | CJL | Roo Flat  | 64657 | 31413 | E | 395 | 1.39  | 23.62 | 0.70820 | 0.00002 |
| cj105   | CJL | Roo Flat  | 64658 | 31413 | E | 393 |       |       | 0.70822 | 0.00001 |
| cj106   | CJL | Roo Flat  | 64659 | 31413 | E | 390 | 1.62  | 23.41 | 0.70821 | 0.00001 |
| cj107   | CJL | Roo Flat  | 64660 | 31413 | F | 385 | 1.66  | 20.22 | 0.70824 | 0.00002 |
| cj108   | CJL | Roo Flat  | 64661 | 31413 | F | 380 | 1.38  | 23.73 | 0.70824 | 0.00001 |
| cj109   | CJL | Roo Flat  | 64662 | 31413 | F | 381 |       |       | 0.70826 | 0.00001 |
| cj110   | CJL | Roo Flat  | 64663 | 31413 | F | 382 | 1.25  | 23.85 | 0.70824 | 0.00001 |
| cj110b  | CJL | Roo Flat  | 64664 | 31413 | F | 382 |       |       |         |         |
| cj111   | CJL | Roo Flat  | 64665 | 31413 | F | 383 | 1.16  | 22.92 | 0.70822 | 0.00002 |
| cj112   | CJL | N side SM | 65363 | 29590 | B | 390 | -1.07 | 20.06 | 0.70858 | 0.00002 |
| cj113   | CJL | N side SM | 65363 | 29590 | F | 405 | 1.36  | 22.43 | 0.70824 | 0.00001 |
| cj114   | CJL | N side SM | 65363 | 29590 | F | 405 | 1.43  | 22.42 | 0.70824 | 0.00001 |
| cj115   | CJL | N side SM | 65363 | 29590 | F | 405 | 1.26  | 22.59 | 0.70825 | 0.00001 |
| cj116   | CJL | N side SM | 65363 | 29590 | F | 405 | 1.38  | 22.87 | 0.70825 | 0.00002 |
| cj117   | CJL | N side SM | 65647 | 29560 | F | 380 | 1.83  | 22.05 | 0.70821 | 0.00002 |
| cj118   | CJL | N side SM | 65647 | 29560 | E | 385 | 0.44  | 24.24 | 0.70818 | 0.00002 |
| cj119   | CJL | N side SM | 65647 | 29560 | B | 390 | 0.81  | 22.60 | 0.70824 | 0.00001 |
| cj119-2 | CJL | N side SM | 65647 | 29560 | B | 390 |       |       | 0.70827 | 0.00001 |

|         |     |                    |       |       |   |     |       |       |         |         |
|---------|-----|--------------------|-------|-------|---|-----|-------|-------|---------|---------|
| cj120   | CJL | N side SM          | 65647 | 29560 | E | 388 | 1.33  | 23.22 | 0.70822 | 0.00001 |
| cj121   | CJL | N side SM          | 65647 | 29560 | E | 380 | 1.53  | 24.06 | 0.70822 | 0.00002 |
| cj122   | CJL | N side SM          | 65647 | 29560 | B | 368 | 1.05  | 22.87 | 0.70830 | 0.00002 |
| cj123   | CJL | N side SM          | 65647 | 29560 | E | 365 | 0.10  | 22.48 | 0.70846 | 0.00002 |
| cj126   | CJL | Currajong Syncline | 66017 | 29337 | B | 325 | 0.94  | 22.67 | 0.70844 | 0.00002 |
| cj126-2 | CJL | Currajong Syncline | 66017 | 29337 | B | 325 |       |       | 0.70846 | 0.70835 |
| cj127   | CJL | Currajong Syncline | 66017 | 29337 | F | 327 | -0.03 | 22.97 | 0.70835 | 0.00001 |
| cj129   | CJL | SM-Curra cliffs    | 65608 | 28984 | E | 390 | 1.62  | 22.66 | 0.70820 | 0.00004 |
| cj132   | CJL | SM-Curra cliffs    | 65608 | 28984 | E | 392 | 1.54  | 22.47 | 0.70821 | 0.00001 |
| cj201   | CJL | SM-Curra cliffs    | 65610 | 28986 | E | 385 |       |       | 0.70826 | 0.00002 |
| cj202   | CJL | SM-Curra cliffs    | 65610 | 28986 | F | 385 |       |       | 0.70827 | 0.00002 |
| cj2     | CJL | Creek bed          | 63603 | 32612 | F | 330 | 0.90  | 22.12 |         |         |
| cj4     | CJL | Creek bed          | 63603 | 32612 | F | 330 | 1.17  | 22.49 |         |         |
| cj4b    | CJL | Creek bed          | 63603 | 32612 | F | 330 |       |       |         |         |
| cj9a    | CJL | Creek bed          | 63603 | 32612 | F | 330 |       |       |         |         |
| cj11b   | CJL | Creek bed          | 63603 | 32612 | F | 330 |       |       |         |         |
| cj14    | CJL | Creek bed          | 63603 | 32612 | F | 330 | 0.33  | 23.34 |         |         |
| cj22    | CJL | Creek bed          | 63603 | 32612 | F | 330 |       |       |         |         |
| cj23    | CJL | Creek bed          | 63603 | 32612 | E | 330 | 1.08  | 23.56 |         |         |
| cj25    | CJL | Creek bed          | 63603 | 32612 | E | 330 |       |       |         |         |
| cj45c   | CJL | Creek bed          | 63603 | 32612 | F | 320 |       |       |         |         |
| sm104   | CJL | SM-Curra cliffs    | 65608 | 28984 | E | 375 |       |       | 0.70824 | 0.00002 |
| sm5     | CJL | SM-Curra cliffs    | 65608 | 28984 | E | 380 |       |       | 0.70823 | 0.00002 |
| bl101   | BFL | Roo flat           | 64680 | 31485 | F | 420 | 0.71  | 21.79 | 0.70833 | 0.00002 |
| bl102   | BFL | Roo flat           | 64680 | 31485 | F | 422 | 0.53  | 23.11 | 0.70849 | 0.00002 |
| bl15    | BFL | Roo flat           | 64685 | 31503 | E | 432 | 1.03  | 22.82 | 0.70852 | 0.00002 |
| bl17    | BFL | Roo flat           | 64685 | 31503 | F | 430 | 1.07  | 19.57 |         |         |
| bl20    | BFL | Roo flat           | 64685 | 31503 | F | 445 |       |       | 0.70861 | 0.00002 |
| bl21    | BFL | Roo flat           | 64685 | 31503 | F | 445 |       |       | 0.70862 | 0.00002 |
| bl22    | BFL | Roo flat           | 64685 | 31503 | E | 445 |       |       | 0.70862 | 0.00002 |
| bl23    | BFL | Roo flat           | 64685 | 31503 | E | 445 |       |       | 0.70861 | 0.00002 |
| bl1     | BFL | Roo flat           | 64678 | 31490 | F | 460 | 0.74  | 20.17 | 0.70860 | 0.00002 |
| bl3     | BFL | Roo flat           | 64678 | 31490 | E | 461 | 0.46  | 23.04 | 0.70860 | 0.00002 |
| bl4     | BFL | Roo flat           | 64678 | 31490 | F | 460 |       |       | 0.70861 | 0.00002 |

|       |     |          |       |       |   |     |      |       |         |         |
|-------|-----|----------|-------|-------|---|-----|------|-------|---------|---------|
| bl4a  | BFL | Roo flat | 64678 | 31490 | F | 460 |      |       | 0.70870 | 0.00002 |
| bl5   | BFL | Roo flat | 64678 | 31490 | E | 440 |      |       | 0.70861 | 0.00006 |
| 18/3  | BFL | SM-south | 64514 | 33506 | F | 500 |      |       |         |         |
| 18/9  | BFL | SM-south | 64590 | 33510 | F | 505 |      |       |         |         |
| R-11  | BFL | SM-south | 65489 | 32706 | E | 520 | 0.98 | 22.65 |         |         |
| w13b  | WL* | Warroo F |       |       |   | 800 | 1.19 | 23.35 |         |         |
| w13b  | WL* | Warroo F |       |       |   | 800 | 0.68 | 23.80 |         |         |
| w13c  | WL* | Warroo F |       |       |   | 800 | 1.44 | 23.73 | 0.70836 | 0.00004 |
| w2    | WL* | Warroo F |       |       |   | 700 | 0.52 | 17.47 |         |         |
| w2a   | WL* | Warroo F |       |       |   | 700 | 0.90 | 10.40 | 0.70836 | 0.00001 |
| w2d   | WL* | Warroo F |       |       |   | 700 | 1.06 | 5.33  | 0.70838 | 0.00004 |
| w2d-2 | WL* | Warroo F |       |       |   | 700 | 0.63 | 17.80 | 0.70838 | 0.00001 |
| w2d-3 | WL* | Warroo F |       |       |   | 700 | 0.22 | 19.70 |         |         |
| w4    | WL* | Warroo F |       |       |   | 730 | 0.25 | 23.00 |         |         |
